# Supplementary material for: Enhanced separation and antifouling performance of reverse osmosis membrane incorporated with carbon nanotubes functionalized by atom transfer radical polymerization
Source: Royal Society of Chemistry journal article supplement (doi:10.1039/c7ra08351c), 2017-01-01
Supplement: c7ra08351c1.pdf [file c7ra08351c1.pdf]

## Supporting Information

### **Enhanced separation and antifouling performance of reverse osmosis membrane incorporated with carbon nanotubes functionalized by atom transfer radical polymerization**

*Man Zhao<sup>†,†††</sup>, Shancan Fu<sup>††</sup>, Hui Feng Zhang<sup>†</sup>, Hai Huang<sup>†</sup>, Yangyang Wei<sup>†</sup>, and Yushan Zhang<sup>†\*</sup>*

<sup>†</sup>Institute of Seawater Desalination and Multipurpose Utilization, State Oceanic Administration, Tianjin 300192, China.

<sup>††</sup>College of Engineering and Technology, Tianjin Agriculture University, Tianjin 300384, China.

<sup>†††</sup>College of Chemistry and Chemical Engineering, Ocean University of China, Qingdao 266100, Shandong, China.

\*Corresponding author, Tel: +86-02287898130; Email: manzhaocrystal@hotmail.com;

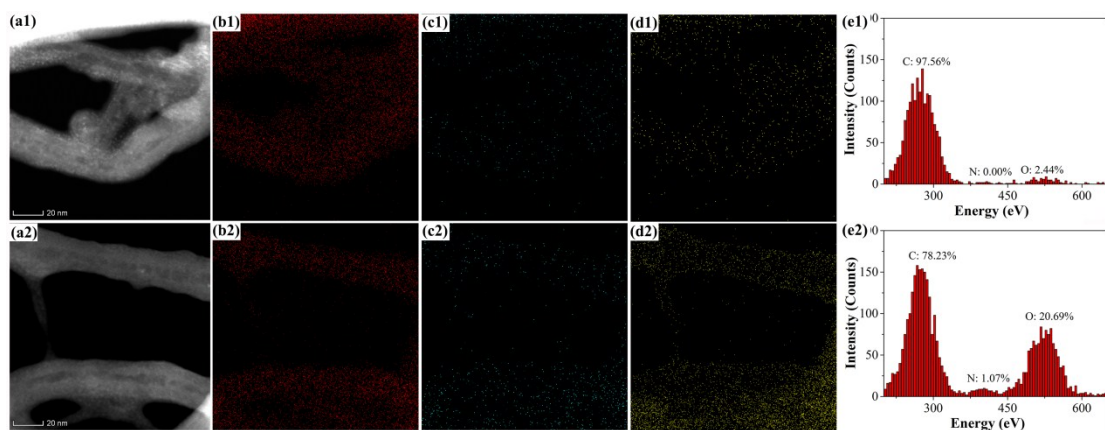

Fig. S1. HAADF-STEM images of (a1) MWCNT-COOH and (a2) PAAm-6h; corresponding HAADF-STEM-EDS elemental mapping images of (1) MWCNT-COOH and (2) PAAm-6h for (b) C, (c) N and (d) O, respectively; EDS spectra of (e1) MWCNT-COOH and (e2) PAAm-6h. The blue signal in (c1) is the background interference of N.

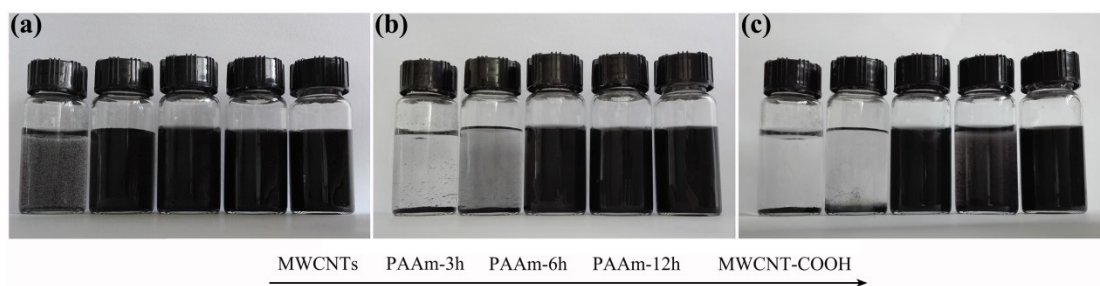

Fig. S2. The dispersion photographs in pure water (0.5 mg/mL) at (a) 0 h, after settling down for (b) 1 h and (c) 72 h of raw MWCNTs and functionalized MWCNTs at 25 °C.

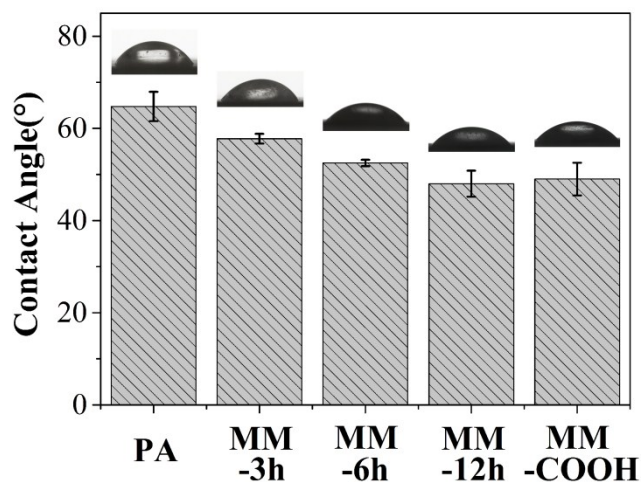

Fig. S3. Static water contact angles of RO membranes.

Table S1. Results of water flux and salt rejection values of RO membranes prepared with different concentrations of PAAm-6h MWCNTs

| Concentration [wt%] <sup>a</sup> | Water flux (L·m <sup>-2</sup> ·h <sup>-1</sup> ) | Rejection (%) |
|----------------------------------|--------------------------------------------------|---------------|
| 0                                | 36.0±1.3                                         | 97.9±0.9      |
| 0.0025                           | 38.4±1.5                                         | 98.2±0.6      |
| 0.005                            | 48.4±0.9                                         | 98.9±0.9      |
| 0.0075                           | 68.5±1.1                                         | 90.0±0.8      |
| 0.01                             | 105.7±3.5                                        | 15.8±0.5      |

<sup>a</sup> wt% in aqueous solution using interfacial polymerization
